# Supplementary material
Source: PubMed Central journal article supplement (PMC3226858)
Supplement: NIHMS325725-supplement-1.pdf [file NIHMS325725-supplement-1.pdf]

## ONLINE SUPPLEMENT

### **A Comparison of Acute Hemorrhagic Stroke Outcomes in two Populations: The Crete-Boston Study**

Ioannis Zaganas, MD<sup>1</sup>, Amy P Halpin, BS<sup>2</sup>, Alexandra Oleinik, BA<sup>2</sup>, Athanasios Alegakis, PhD<sup>3</sup>, Dimitra Kotzamani, MD<sup>1</sup>, Spiros Zafiris, MD<sup>1</sup>, Chryssanthi Chlapoutaki, MD<sup>1</sup>, Dimitris Tsimoulis, MD<sup>1</sup>, Emmanouil Giannakoudakis, MD<sup>1</sup>, Nikolaos Chochlidakis, MD<sup>4</sup>, Aikaterini Ntailiani, MD<sup>5</sup>, Christina Valatsou, MD<sup>5</sup>, Efrosini Papadaki, MD<sup>5</sup>, Antonios Vakis, MD<sup>4</sup>, Karen L Furie, MD<sup>2</sup>, Steven M Greenberg, MD<sup>2</sup>, Andreas Plaitakis, MD<sup>1</sup>

<sup>1</sup>Neurology, <sup>3</sup>Toxicology, <sup>4</sup>Neurosurgery and <sup>5</sup>Radiology Department, University Hospital of Heraklion, Crete, Greece;

<sup>2</sup>Stroke Service, Massachusetts General Hospital, Boston, MA, USA

Address correspondence to:

Andreas Plaitakis, MD, PhD,

Professor and Chairman, Department of Neurology

Tel. +30-2810-394648; Fax +30-2810-394839; E-mail: [plaitakis@yahoo.com](mailto:plaitakis@yahoo.com)

## Supplemental Methods

### *Imaging studies*

All patients included in this study had CT-documented acute ICH. Brain imaging studies, obtained in the Cretan and Boston center, were compared directly regarding the location and volume of the ICH. For this, scans from Boston were sent to Crete in digital form, after removal of all patient-related information. The location of the ICH was independently determined (by EP, AN and CV) taking into consideration the following: hematomas located either entirely in the basal ganglia or in the thalamus or those extending to adjacent structures (cerebrum or brainstem) were included under basal ganglia and thalamus categories, respectively; hematomas spanning both the basal ganglia and the thalamus were included under the basal ganglia category; hemorrhages involving the cerebral lobes, the brainstem or the cerebellum were assigned to these categories only when confined to these structures. Hematoma volume was calculated using the ABC/2 formula, which has been shown to offer a good approximation of the actual hematoma volume.<sup>1</sup>

### *Assessment of adverse outcomes*

Significant medical events during hospitalization of Cretan patients, such as pulmonary embolism, deep venous thrombosis, gastrointestinal tract hemorrhage, and infections requiring intravenous antibiotics, were recorded. Also, blood glucose levels were closely monitored.

### *Statistical analysis*

Multiple logistic regression analysis was performed with backward selection in an initial dataset of variables that included sex, age (per 5-year increments), volume (in a logarithmic scale) and location (lobar versus non-lobar) of ICH, GCS on admission, hypertension, diabetes mellitus, coronary artery disease, antiplatelet, anticoagulant and statin use, smoking in the previous five years and dexamethasone administration.

## Supplemental Tables

**Table S1.A. Dexamethasone dosing of Cretan patients (n=340)**

|                                       |              |
|---------------------------------------|--------------|
| <b>Total DxM Dosage received (mg)</b> |              |
| Mean ± SD                             | 113.8 ± 83.3 |
| <b>Treatment duration (days)</b>      |              |
| Mean ± SD                             | 9.0 ± 5.7    |
| <b>Initial DxM Dose:</b>              |              |
| no of patients treated (%)            |              |
| 8 mg                                  | 5 (1.8%)     |
| 12 mg                                 | 12 (4.2%)    |
| 16 mg                                 | 121 (42.6%)  |
| 24 mg                                 | 88 (31.0%)   |
| 32 mg                                 | 58 (20.4%)   |

**Table S1.B. Patient characteristics and initial dexamethasone dosing**

|                             | <b>16 mg<br/>(n=121)</b> | <b>24 mg (n=88)</b> | <b>32 mg (n=58)</b> | <b>P</b> |
|-----------------------------|--------------------------|---------------------|---------------------|----------|
| <b>Age</b> -yrs: Mean ± SD  | 72.3 ± 11.7              | 73.9 ± 12.5         | 73.4 ± 13.3         | 0.651    |
| <b>Male sex</b> –no. (%)    | 69 (57.0%)               | 48 (54.5%)          | 37 (63.8%)          | 0.532    |
| <b>GCS score</b> -mean ± SD | 12.5 ± 3.4               | 11.1 ± 4.2          | 9.6 ± 4.4           | <0.001   |
| <b>mRankin</b> -mean ± SD   | 4.0 ± 1.2                | 4.3 ± 1.1           | 4.5 ± 1.0           | 0.012    |
| <b>Hematoma volume (ml)</b> |                          |                     |                     |          |
| Mean ± SD                   | 21.3 ± 34.0              | 38.0 ± 43.4         | 63.0 ± 67.5         | <0.001   |

**Table S2. Baseline characteristics of AHS patients on admission**

|                                                | <b>Crete-Dex<br/>(n=340)</b> | <b>Boston-No Dex<br/>(n=510)</b> | <b>p</b> |
|------------------------------------------------|------------------------------|----------------------------------|----------|
| <b>Age (yr) -</b>                              |                              |                                  |          |
| Mean ± SD                                      | 73.1 ± 12.1                  | 72.7 ± 12.3                      | 0.613    |
| <b>Male sex</b> -no. (%)                       | 204 (60.0%)                  | 281 (55.1%)                      | 0.157    |
| <b>Transfer from another hospital</b> -no. (%) | 45 (16.0%)                   | 339 (68.5%)                      | <0.001   |
| <b>Time from onset to ER (h)-mean±SD</b>       | 9.8 ± 18.1                   | 9.1 ± 19.2                       | 0.672    |
| <b>Time from onset to CT (h)-mean±SD</b>       | 11.7 ± 18.2                  | 10.7 ± 20.0                      | 0.584    |
| <b>Admission SAP (mmHg)-mean±SD</b>            | 169.1 ± 28.7                 | 177.8 ± 37.2                     | 0.001    |
| <b>Admission DAP (mmHg)-mean±SD</b>            | 91.5 ± 18.7                  | 93.1 ± 23.7                      | 0.351    |
| <b>Admission Glucose (mg/dl)-mean±SD</b>       | 150.5 ± 59.6                 | 155.1 ± 63.9                     | 0.357    |
| <b>GCS score</b> -mean ± SD                    | 11.6 ± 3.9                   | 11.0 ± 4.6                       | 0.062    |
| <b>Location of hemorrhage</b> -no. (%)         |                              |                                  | 0.097    |
| Lobes                                          |                              |                                  |          |
| Basal ganglia                                  | 102 (30.0%)                  | 194 (38.0%)                      |          |
| Thalamus                                       | 134 (39.4%)                  | 159 (31.2%)                      |          |
| Brainstem                                      | 52 (15.3%)                   | 71 (13.9%)                       |          |
| Cerebellum                                     | 12 (3.5%)                    | 20 (3.9%)                        |          |
| Multiple/IV                                    | 28 (8.2%)                    | 40 (7.8%)                        |          |
| <b>Intraventricular blood</b> -no. (%)         | 12 (3.5%)                    | 26 (5.1%)                        |          |
| <b>Hematoma volume</b> (ml)                    |                              |                                  | 0.025    |
| Mean ± SD                                      | 140 (41.9%)                  | 252 (49.6%)                      |          |
| Median (range)                                 | 35.1 ± 49.0                  | 40.1 ± 50.3                      | 0.109    |
| <b>Hematoma max diameter</b> (cm)              | 14.7 (0.1-297.5)             | 18.4 (0.0-349.9)                 | 0.101    |
| Mean ± SD                                      | 4.3 ± 2.1                    | 4.6 ± 2.3                        |          |
| <b>Anticoagulants</b> -no. (%)                 | 34 (10.5%)                   | 151 (29.6%)                      | <0.001   |
| <b>Antiplatelets</b> -no. (%)                  | 64 (19.8%)                   | 254 (49.8%)                      | <0.001   |
| <b>Atrial Fibrillation</b> -no. (%)            | 45 (13.9%)                   | 143 (28.3%)                      | <0.001   |
| <b>Diabetes Mellitus</b> -no. (%)              | 62 (19.1%)                   | 109 (21.6%)                      | 0.383    |
| <b>Hypertension</b> -no. (%)                   | 251 (76.5%)                  | 421 (83.2%)                      | 0.017    |
| <b>Coronary Artery Disease</b> -no. (%)        | 40 (14.3%)                   | 105 (21.4%)                      | 0.016    |
| <b>Smoking</b> -no. (%)                        | 44 (19.0%)                   | 73 (21.7%)                       | 0.624    |
| <b>Statin use</b> -no. (%)                     | 20 (8.4%)                    | 168 (33.9%)                      | <0.001   |
| <b>Previous ICH</b> -no. (%)                   | 30 (9.7%)                    | 31 (6.1%)                        | 0.060    |

| <b>Table S3. Intention to treat analysis</b>         |                                         |                                            |          |
|------------------------------------------------------|-----------------------------------------|--------------------------------------------|----------|
| <b>Outcome</b>                                       | <b>Boston<br/>2003-2009<br/>(n=510)</b> | <b>Crete-all<br/>1997-2010<br/>(n=391)</b> | <b>P</b> |
| <b>Death in hospital-no. (%)</b>                     | 194 (38.0%)                             | 99 (25.3%)                                 | <0.001   |
| <b>Death (30 days)- no. (%)</b>                      | 201 (39.4%)                             | 95 (26.8%)                                 | <0.001   |
| <b>Death (90 days)- no. (%)</b>                      | 223 (43.7%)                             | 110 (33.7%)                                | 0.004    |
| <b>Average in hospital stay<br/>Days (mean ± SD)</b> | 8.8 ± 11.8                              | 15.2 ± 17.6                                | <0.001   |
| <b>Mod. Rankin on discharge<br/>(mean ± SD)</b>      | 4.5 ± 1.5                               | 3.9 ± 1.8                                  | <0.001   |
| <b>Mod. Rankin on discharge-no.<br/>(%)</b>          |                                         |                                            | <0.001   |
| 0                                                    | 7 (1.4%)                                | 12 (3.6%)                                  |          |
| 1                                                    | 17 (3.5%)                               | 38 (11.3%)                                 |          |
| 2                                                    | 23 (4.7%)                               | 33 (9.9%)                                  |          |
| 3                                                    | 75 (15.2%)                              | 42 (12.5%)                                 |          |
| 4                                                    | 142 (28.9%)                             | 79 (23.6%)                                 |          |
| 5                                                    | 32 (6.5%)                               | 32 (9.6%)                                  |          |
| 6                                                    | 196 (39.8%)                             | 99 (29.6%)                                 |          |
| <b>Serious adverse events-no. (%)</b>                |                                         |                                            |          |
| Pulmonary Embolism                                   | -                                       | 2 (0.6%)                                   |          |
| Gastrointestinal Hemorrhage                          | -                                       | 4 (1.3%)                                   |          |
| DVT                                                  | -                                       | 1 (0.3%)                                   |          |
| Infection                                            | -                                       | 118 (34.1%)                                |          |

Includes all AHS patients admitted to the University hospital of Crete during the reporting period, irrespectively whether their IVDxM treatment status is known.

---

**Table S4. In-hospital and 30 day-mortality according to the location of the hemorrhage**

---

| <b><u>Location</u></b>                             | <b>In-hospital, n (%)</b>       |                                 |                  | <b>30-day, n (%)</b>            |                                 |                  |
|----------------------------------------------------|---------------------------------|---------------------------------|------------------|---------------------------------|---------------------------------|------------------|
|                                                    | <b><u>Crete</u></b>             | <b><u>Boston</u></b>            | <b><u>P</u></b>  | <b><u>Crete</u></b>             | <b><u>Boston</u></b>            | <b><u>P</u></b>  |
| <b>Lobar</b>                                       | 29/102<br>(28.4%)               | 63/194<br>(32.5%)               | 0.475            | 28/92<br>(30.4%)                | 66/194<br>(34.0%)               | 0.546            |
| <b>Basal Ganglia</b>                               | <b>33/134</b><br><b>(24.6%)</b> | <b>74/159</b><br><b>(46.5%)</b> | <b>&lt;0.001</b> | <b>31/119</b><br><b>(26.1%)</b> | <b>75/159</b><br><b>(47.2%)</b> | <b>&lt;0.001</b> |
| <b>Thalamic</b>                                    | <b>5/52</b><br><b>(9.6%)</b>    | <b>17/71</b><br><b>(23.9%)</b>  | <b>0.041</b>     | <b>6/47</b><br><b>(12.8%)</b>   | <b>20/71</b><br><b>(28.2%)</b>  | <b>0.048</b>     |
| <b>Cerebellar</b>                                  | 5/28<br>(17.9%)                 | 11/40<br>(27.5%)                | 0.356            | 5/27<br>(18.5%)                 | 11/40<br>(27.5%)                | 0.398            |
| <b>Brainstem</b>                                   | 4/12<br>(33.3%)                 | 13/20<br>(65.0%)                | 0.082            | 4/11<br>(36.4%)                 | 13/20<br>(65.0%)                | 0.125            |
| <b>Multiple Territories/<br/>Intra-ventricular</b> | 5/12<br>(41.7%)                 | 16/26<br>(61.5%)                | 0.252            | 4/11<br>(36.4%)                 | 16/26<br>(61.5%)                | 0.160            |

---

**Table S5. Clinical outcomes**

|                                             | <b>Boston<br/>(n=510)<br/>2003-2009</b> | <b>Crete<br/>(n=340)<br/>1997-2010</b> |       | <b>Crete<br/>(n=190)<br/>2003-2009</b> |       |
|---------------------------------------------|-----------------------------------------|----------------------------------------|-------|----------------------------------------|-------|
| <b>Blood Glucose (mg/dl)</b><br>(mean ± SD) |                                         |                                        |       |                                        |       |
| At 3 days post admission                    | 138.7 ± 43.9                            | 148.1 ± 58.3                           | 0.038 | 155.8 ± 65.2                           | 0.004 |
| At 6 days post admission                    | 136.7 ± 41.7                            | 146.4 ± 69.1                           | 0.083 | 154.9 ± 73.4                           | 0.007 |
| At 9 days post admission                    | 150.9 ± 58.3                            | 137.4 ± 68.9                           | 0.080 | 140.1 ± 64.4                           | 0.226 |
| <b>Serious adverse events-no. (%)</b>       |                                         |                                        |       |                                        |       |
| Pulmonary Embolism                          | -                                       | 2 (0.7%)                               |       | 1 (0.6%)                               |       |
| Gastrointestinal Hemorrhage                 | -                                       | 3 (1.1%)                               |       | 2 (1.2%)                               |       |
| DVT                                         | -                                       | 1 (0.3%)                               |       | 1 (0.6%)                               |       |
| Infection                                   | -                                       | 105 (33.2%)                            |       | 59 (33.1%)                             |       |

**Supplemental Figures**

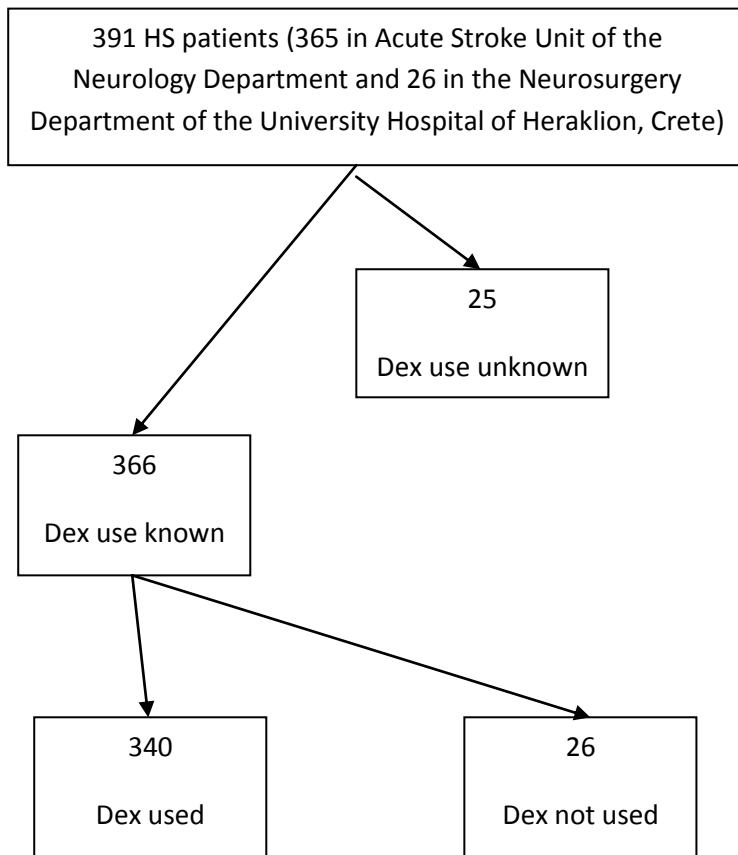

**Figure S1.** Flow chart of patients from Crete included in the analysis. Dex: Dexamethasone.



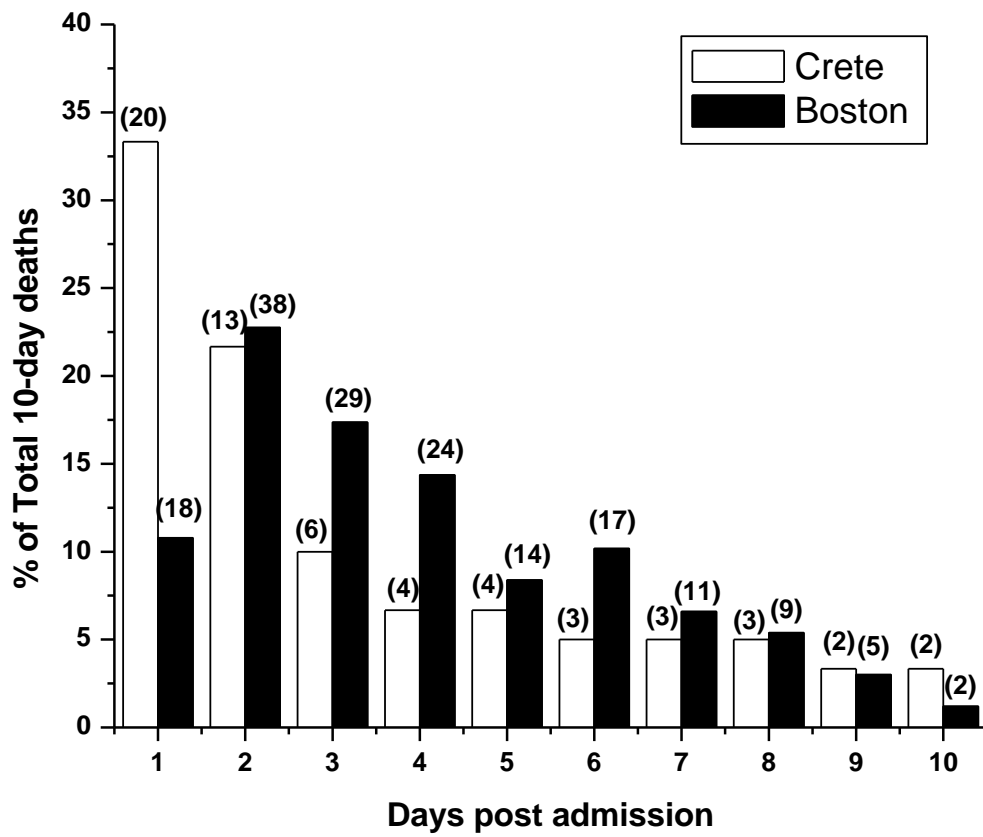

**Figure S2.** Daily death rates as percentage of the 10-day mortality in Crete and Boston (total number of deaths 60 and 167, respectively). Each successive doublet of columns represents different days post admission (shown under the x axis). The numbers in parentheses above each column represent the number of deaths.

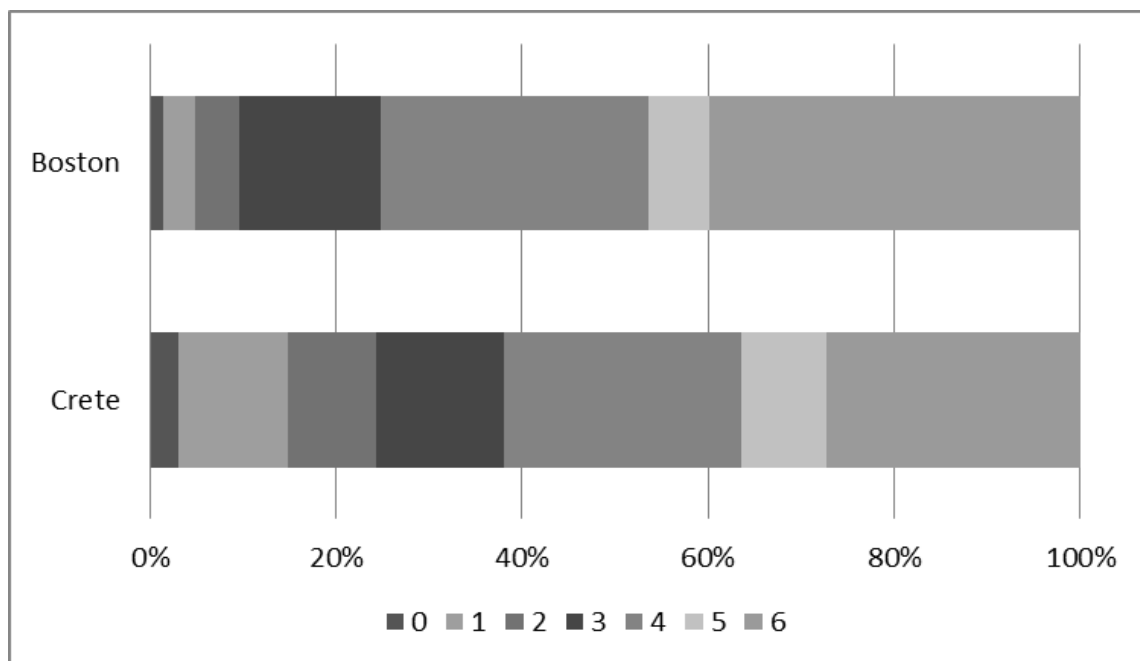

**Figure S3.** mRankin Scale on discharge for patients with AHS in Boston (upper panel) and Crete (lower panel).

## Supplemental References

- 1) Kothari R, Brott T, Broderick J, Barsan W, Sauerbeck L, Zuccarello M, et al. The ABCs of measuring intracerebral hemorrhage volumes. *Stroke*. 1996; 27: 1304-1305.
